# Supplementary material for: Dietary Patterns and Incident Type 2 Diabetes in Chinese Men and Women: The Singapore Chinese Health Study
Source: PubMed Central journal article supplement — Diabetes Care. 2011 Mar 21;34(4):880–5. doi: 10.2337/dc10-2350 (PMC3064045; doi:10.2337/dc10-2350), 2011-03-21
Supplement: supp_dc10-2350v102350_DC102350SupplementaryData.pdf [file supp_dc10-2350v102350_DC102350SupplementaryData.pdf]

SUPPLEMENTARY DATA

**Supplementary Table 1: Factor loadings for foods with vegetable, fruit, and soy rich dietary pattern in Singapore Chinese Health Study (VFS)**

| <i>Food Item</i>              | <i>Food type</i> | <i>Loading</i> | <i>Food Item</i>         | <i>Food type</i> | <i>Loading</i> |
|-------------------------------|------------------|----------------|--------------------------|------------------|----------------|
| Cauliflower                   | V                | 0.54           | Fried vegetarian beehoon | St, V            | 0.20           |
| Broccoli                      | V                | 0.49           | Soy bean drink           | S                | 0.20           |
| Carrots                       | V                | 0.49           |                          |                  |                |
| Green beans/peas              | V                | 0.48           |                          |                  |                |
| Other plain tofu              | S                | 0.46           |                          |                  |                |
| Yin choy, po choy             | V                | 0.43           |                          |                  |                |
| Corn                          | V                | 0.43           |                          |                  |                |
| Tung goo                      | O, Pr            | 0.43           |                          |                  |                |
| Tomatoes                      | V                | 0.42           |                          |                  |                |
| Gum jum, dried fungus         | O, Pr            | 0.42           |                          |                  |                |
| White potatoes                | V, St            | 0.41           |                          |                  |                |
| Head lettuce, Chinese lettuce | V                | 0.41           |                          |                  |                |
| Kai lan                       | V                | 0.40           |                          |                  |                |
| Other tau kwa                 | S                | 0.40           |                          |                  |                |
| Tou gay, tai tau nga          | V                | 0.40           |                          |                  |                |
| Pak choy, siew pak choy       | V                | 0.40           |                          |                  |                |
| Choi sum                      | V                | 0.40           |                          |                  |                |
| Fu kua, mo qua                | V                | 0.38           |                          |                  |                |
| Head cabbage, wong nga pak    | V                | 0.38           |                          |                  |                |
| Watercress                    | V                | 0.37           |                          |                  |                |
| Foojook vegetarian meats      | S                | 0.37           |                          |                  |                |
| Celery                        | V                | 0.37           |                          |                  |                |
| Kai choy                      | V                | 0.35           |                          |                  |                |
| Cucumber                      | V                | 0.34           |                          |                  |                |
| Apples                        | F                | 0.34           |                          |                  |                |
| Other tau pok                 | S                | 0.32           |                          |                  |                |
| Yong tau foo                  | S                | 0.31           |                          |                  |                |
| Papaya                        | F                | 0.31           |                          |                  |                |
| Pears                         | F                | 0.31           |                          |                  |                |
| Other dark green leaves       | V                | 0.31           |                          |                  |                |
| Canned baked beans            | L                | 0.30           |                          |                  |                |
| Honeydew                      | F                | 0.30           |                          |                  |                |
| Gee choy                      | V                | 0.29           |                          |                  |                |
| Bananas                       | F                | 0.29           |                          |                  |                |
| Watermelon                    | F                | 0.28           |                          |                  |                |
| Grapes                        | F                | 0.28           |                          |                  |                |
| Boiled/steamed fish           | Fi               | 0.27           |                          |                  |                |
| Fish ball/cake                | Fi               | 0.27           |                          |                  |                |
| Oranges                       | F                | 0.27           |                          |                  |                |
| Ung choy                      | V                | 0.26           |                          |                  |                |
| Onions                        | V                | 0.26           |                          |                  |                |
| Chinese chives                | V, O             | 0.26           |                          |                  |                |
| Tofu far                      | S                | 0.25           |                          |                  |                |
| Pan/stir fried chicken        | P                | 0.25           |                          |                  |                |
| Ikan bilis                    | Pr, Fi           | 0.22           |                          |                  |                |

\*Factor loads correspond to Pearson correlation coefficients between the food and the respective dietary pattern.

-*Definitions of abbreviations:* B-beverage; C-condiment; Da-dairy; DS- dim sum/snack dish; F-fruit; Fi-fish/shellfish/seafood; L-legumes; M-meat; O-other; P-poultry; Pr- preserved; S-soy food; St-high starch item (e.g. noodle dish, rice dish); Sw-sweet; WG-whole grain

SUPPLEMENTARY DATA

**Supplementary Table 2: Factor loadings for foods with dim-sum and meat rich dietary pattern in Singapore Chinese Health Study (DSM)**

| <i>Food Item</i>             | <i>Food type</i> | <i>Loading</i> | <i>Food Item</i>       | <i>Food type</i> | <i>Loading</i> |
|------------------------------|------------------|----------------|------------------------|------------------|----------------|
| Siew mai                     | DS, M            | 0.44           | Fresh Chilis           | C                | 0.21           |
| Other steamed snack          | DS, M            | 0.42           | Chee cheong fun        | DS,M             | 0.21           |
| Gravy noodle                 | St, M            | 0.42           | Watermelon             | F                | 0.21           |
| Chicken rice                 | St, P            | 0.41           | Other pork             | M                | 0.20           |
| Otar otar                    | DS               | 0.39           | Ung choi               | V                | 0.20           |
| Chicken, mutton curry        | M                | 0.39           | Salted roots           | Pr, V            | 0.20           |
| Steamed meat bao             | DS, M            | 0.38           | Balachan               | C                | 0.20           |
| Glutinous rice dumpling      | St, M            | 0.38           | Other dried seafood    | Fi, Pr           | 0.20           |
| Pork satay                   | M                | 0.37           | Flavored rice porridge | St               | 0.20           |
| Roasted duck or goose        | P                | 0.36           | Deep fried fish        | Fi               | 0.20           |
| Popiah                       | DS, M            | 0.36           | Baked buns w/meat      | St, M            | 0.20           |
| Other pig organs (intestine) | M                | 0.35           | Hot dogs               | M, Pr            | 0.20           |
| Ngor hiang                   | DS, M            | 0.35           |                        |                  |                |
| Preserved eggs               | O, Pr            | 0.35           |                        |                  |                |
| Roti prata                   | St               | 0.35           |                        |                  |                |
| Chinese rojak                | DS, V            | 0.35           |                        |                  |                |
| Puffs, curry or bean         | DS, V            | 0.34           |                        |                  |                |
| Coconut rice                 | St               | 0.34           |                        |                  |                |
| Deep fried chicken           | P                | 0.34           |                        |                  |                |
| Other flavored rice          | St, M            | 0.34           |                        |                  |                |
| Dry noodle dish              | St, M            | 0.34           |                        |                  |                |
| Chicken satay                | P                | 0.33           |                        |                  |                |
| Curry rice                   | St               | 0.33           |                        |                  |                |
| Coconut desserts             | DS, Sw           | 0.32           |                        |                  |                |
| Belly pork                   | M                | 0.32           |                        |                  |                |
| Deep-fried snacks            | DS               | 0.32           |                        |                  |                |
| Other fried noodle           | St, M, Fi        | 0.31           |                        |                  |                |
| Lup chong                    | M                | 0.31           |                        |                  |                |
| Luncheon meat                | M                | 0.30           |                        |                  |                |
| Squid                        | Fi               | 0.29           |                        |                  |                |
| Soft drinks                  | B, Sw            | 0.29           |                        |                  |                |
| Fried rice                   | St               | 0.28           |                        |                  |                |
| Canned sardine               | Fi               | 0.28           |                        |                  |                |
| Sweet kuey                   | DS, Sw           | 0.28           |                        |                  |                |
| Pork liver                   | M                | 0.27           |                        |                  |                |
| Salted fish                  | Fi, Pr           | 0.26           |                        |                  |                |
| Shrimp                       | Fi               | 0.26           |                        |                  |                |
| Eggs                         | O                | 0.26           |                        |                  |                |
| French fries                 | St, O            | 0.25           |                        |                  |                |
| Steamed sweet bao            | DS, Sw           | 0.25           |                        |                  |                |
| Red/green bean soups         | DS               | 0.25           |                        |                  |                |
| Ice cream/Frozen yogurt      | Da, Sw           | 0.25           |                        |                  |                |
| Pineapple                    | F                | 0.22           |                        |                  |                |
| Western Cakes                | DS,Sw            | 0.22           |                        |                  |                |
| Hamburgers                   | M                | 0.22           |                        |                  |                |

\*Factor loads correspond to Pearson correlation coefficients between the food and the respective dietary pattern.

-*Definitions of abbreviations:* B-beverage; C-condiment; Da-dairy; DS- dim sum/snack dish; F-fruit; Fi-fish/shellfish/seafood; L-legumes; M-meat; O-other; P-poultry; Pr- preserved; S- soy food; St-high starch item (e.g. noodle dish, rice dish); Sw-sweet; WG-whole grain
